# Supplementary material
Source: publisher site journal article supplement (https://www.dovepress.com/article/432453)
Supplement: Supplementary file 1 [file get_supplementary_file.php]

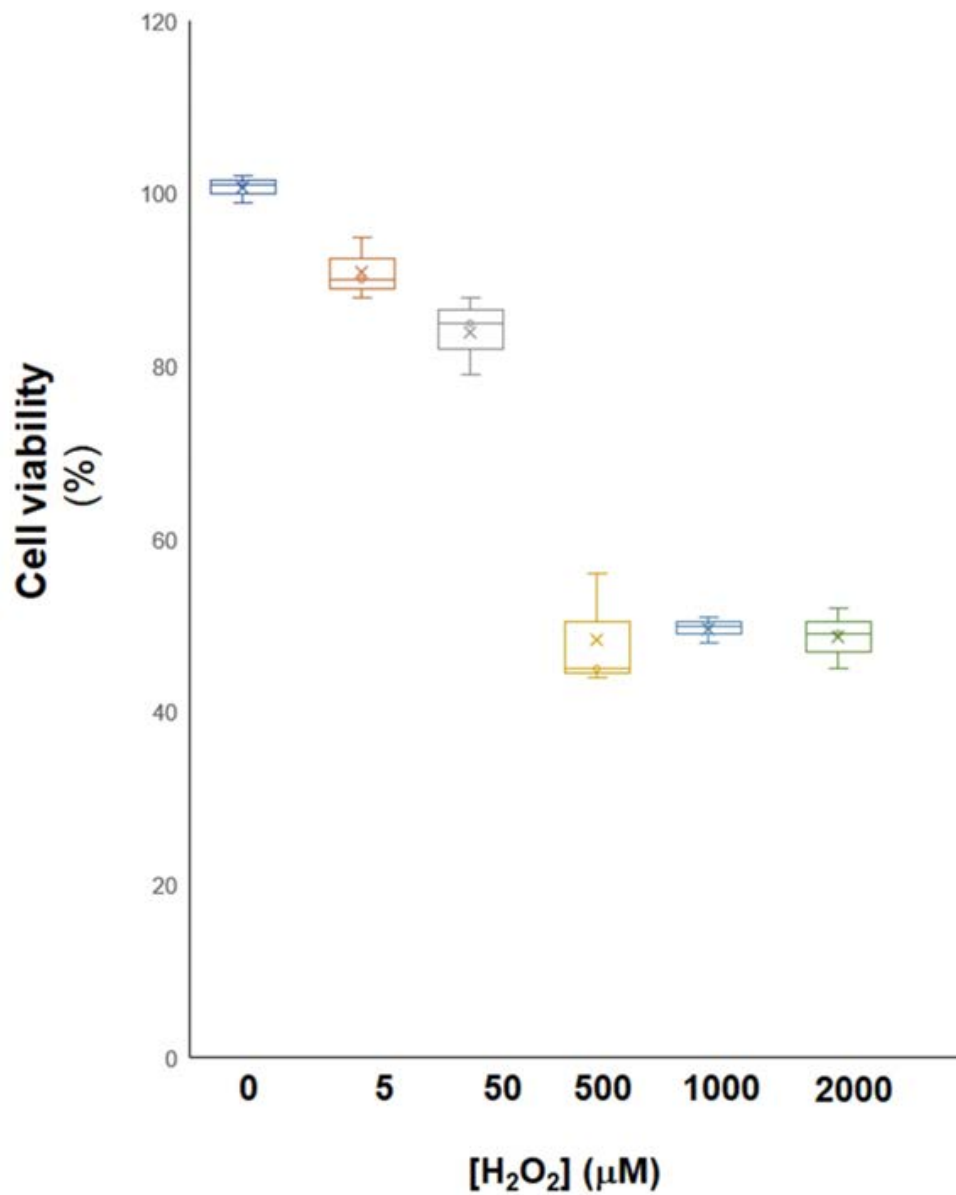

**Supplementary Figure 1. H<sub>2</sub>O<sub>2</sub> concentration titration in terms of cell death in H9c2 cardiomyocytes.** H9c2 cardiomyocytes were treated with the indicated concentrations of H<sub>2</sub>O<sub>2</sub> for 10 hours prior to cell viability determination. Results are expressed as % of control (vehicle, 0.5% DMSO). Since cell viability “plateaued” at 500 µM H<sub>2</sub>O<sub>2</sub>, this was the concentration of H<sub>2</sub>O<sub>2</sub> chosen for all subsequent experiments (n=6 independent determinations for each H<sub>2</sub>O<sub>2</sub> concentration tested).
